# Supplementary material for: An autologous human iPSC-derived 3D organoid infection model for preclinical testing of antiviral T cells
Source: Research Square preprint supplement (doi:10.21203/rs.3.rs-7871790/v1), 2025-10-29
Supplement: Supplementary file 1 [file 1a6981877d59ba4bfd57f597.docx]

**Supplementary Figures**

**
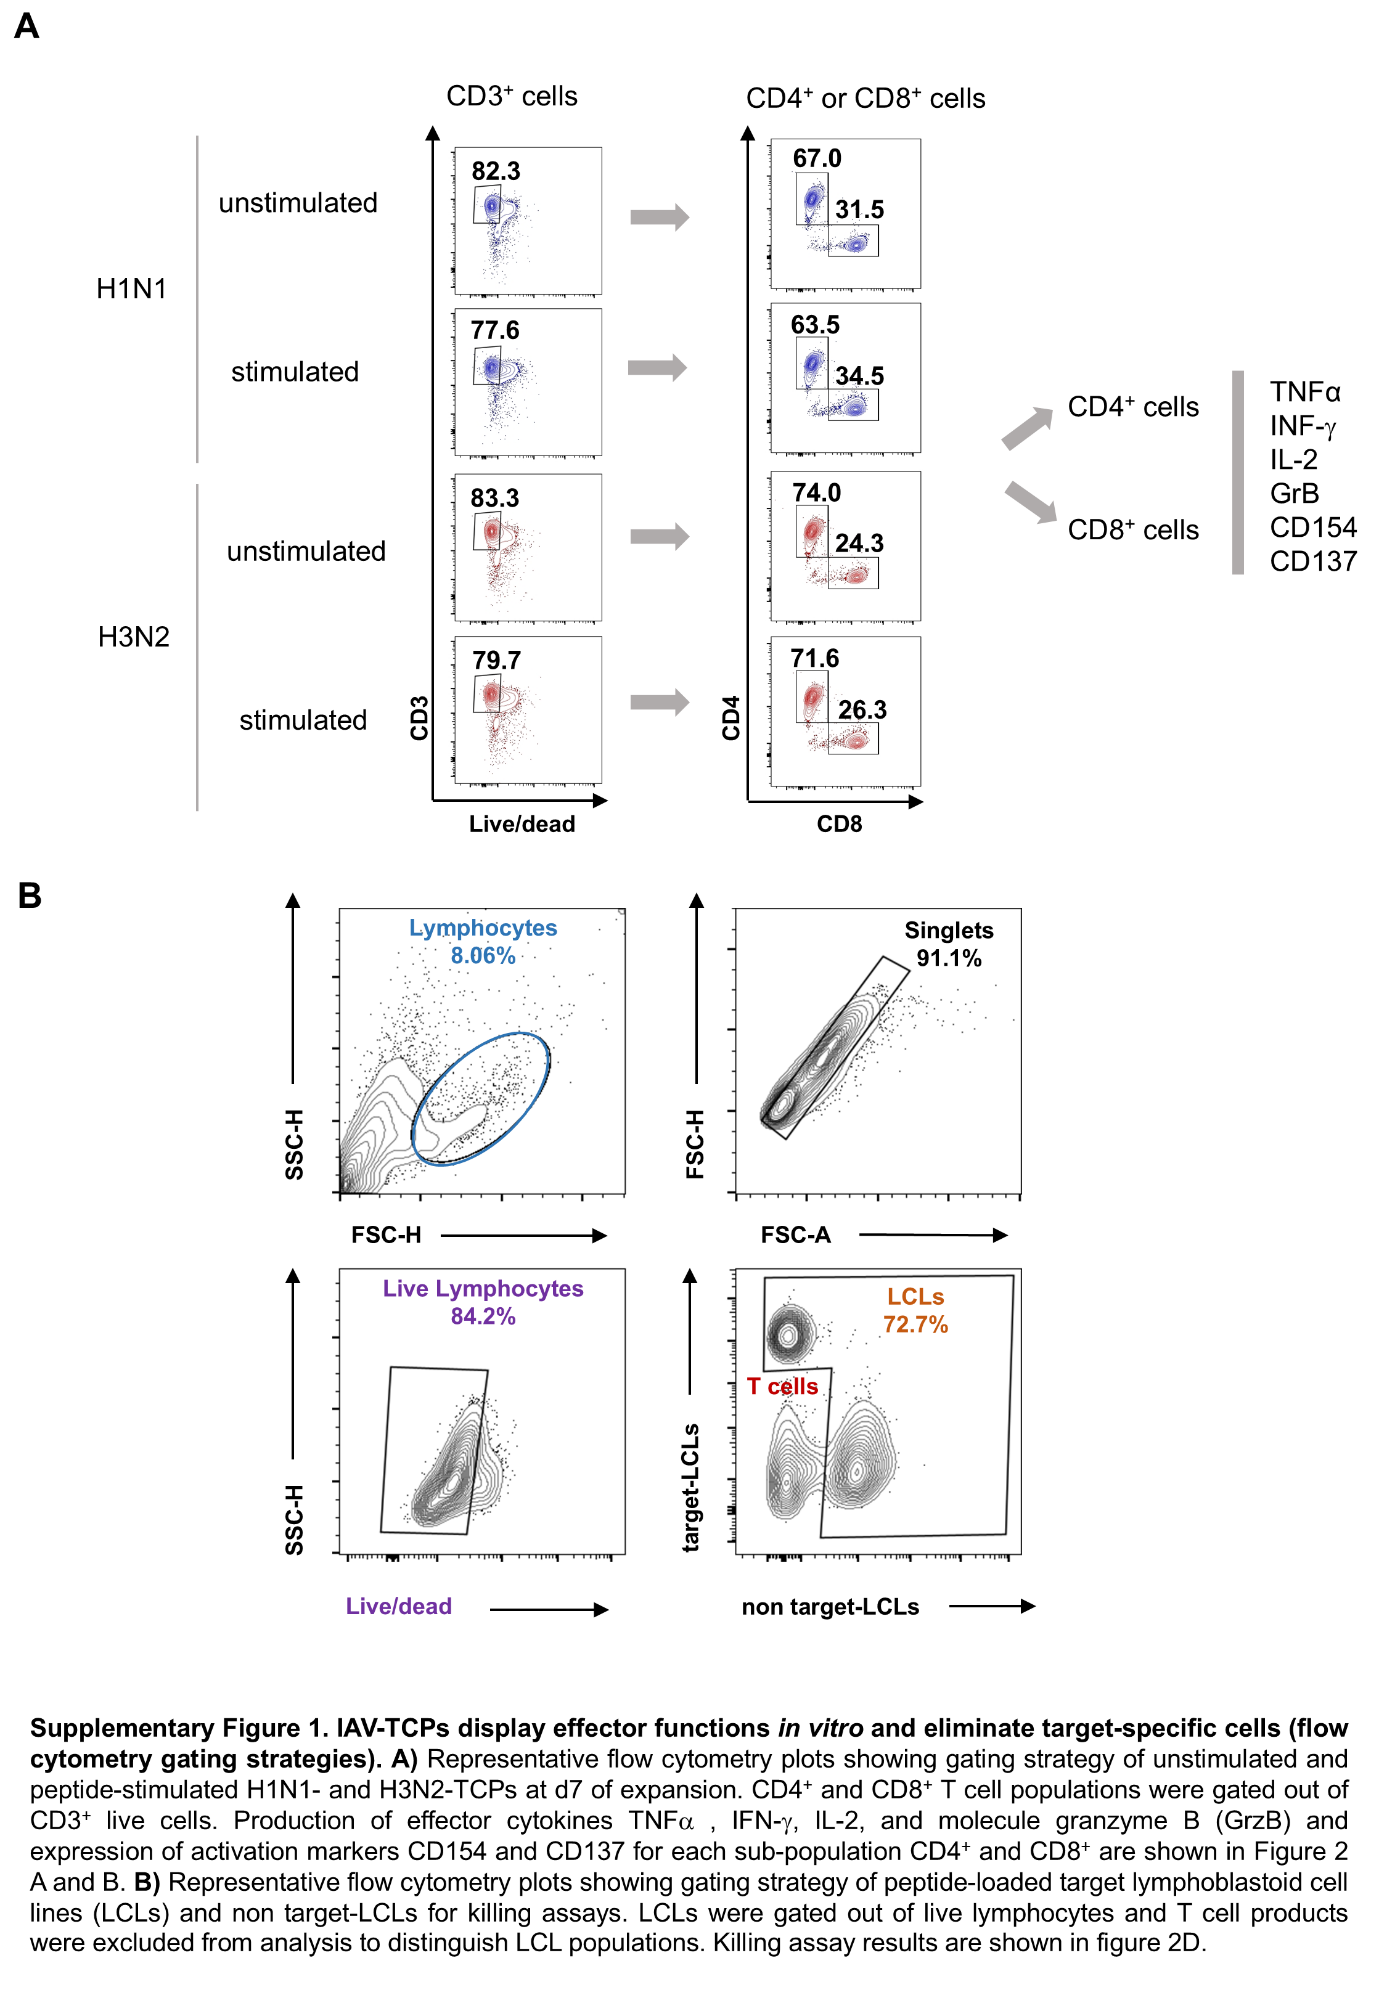
**

**Supplementary Figure 1. IAV-TCPs display effector functions in vitro and eliminate target-specific cells (flow cytometry gating strategies). A)** Representative flow cytometry plots showing gating strategy of unstimulated and peptide-stimulated H1N1- and H3N2-TCPs at d7 of expansion. CD4+ and CD8+ T cell populations were gated out of CD3+ live cells. Production of effector cytokines TNF , IFN-, IL-2, and molecule granzyme B (GrzB) and expression of activation markers CD154 and CD137 for each sub-population CD4+ and CD8+ are shown in Figure 2 A and B. **B)** Representative flow cytometry plots showing gating strategy of peptide-loaded target lymphoblastoid cell lines (LCLs) and non target-LCLs for killing assays. LCLs were gated out of live lymphocytes and T cell products were excluded from analysis to distinguish LCL populations. Killing assay results are shown in figure 2D.

**
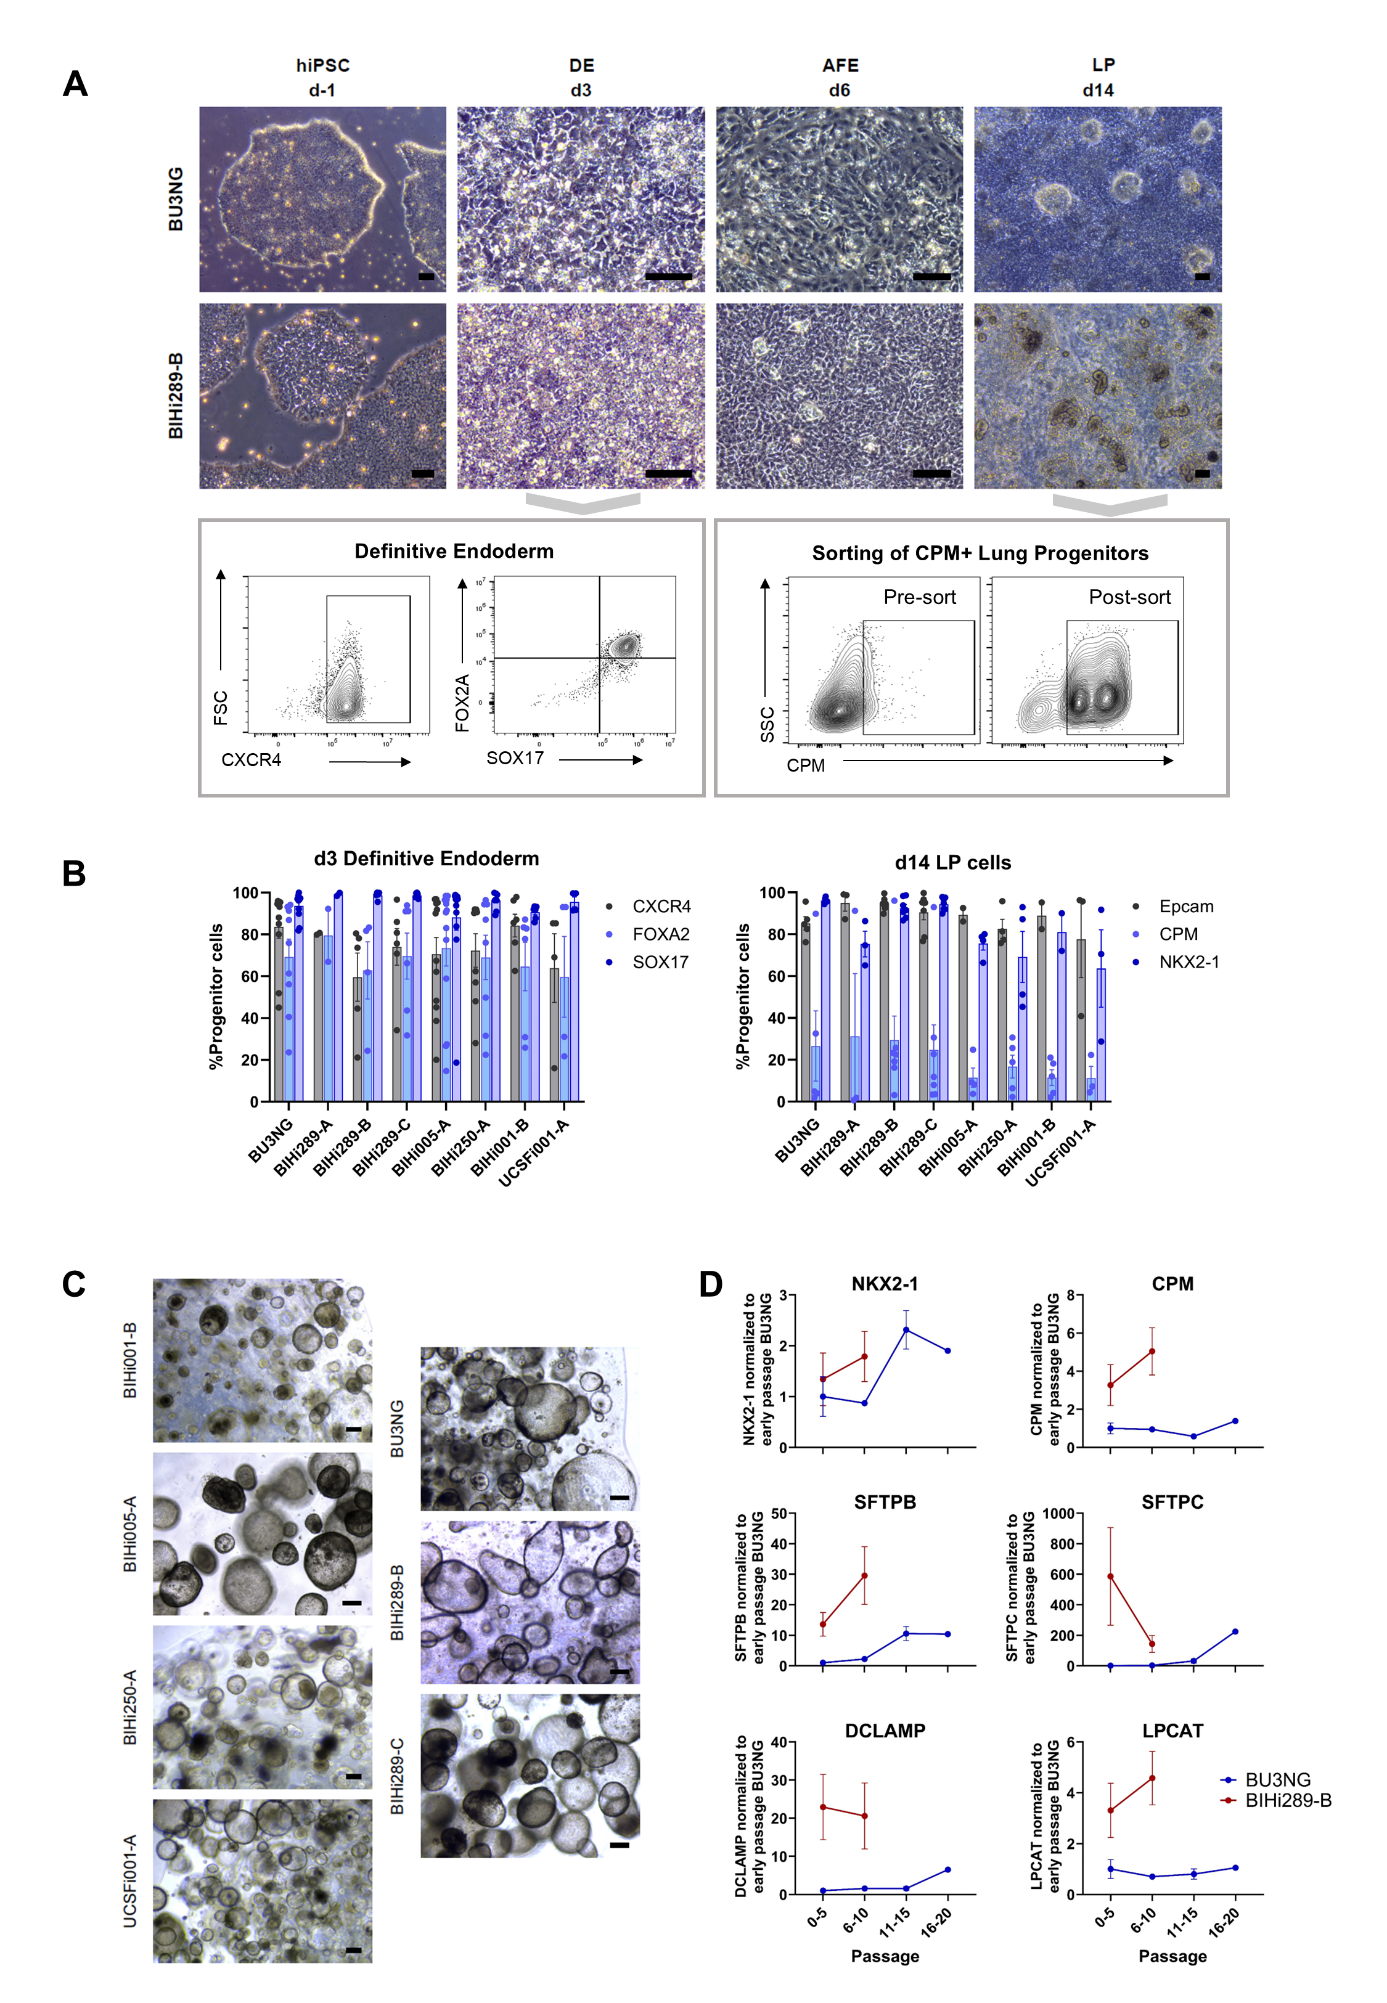
**

**Supplementary Figure 2. iPSC-aLOs differentiation is robust across hiPSC lines. A)** Timeline with representative images of iPSC differentiation to LP with representative images at each stage (upper panel). Representative flow plots showing gating strategy for quality assessment of DE differentiation at d3 and sorting efficiency of carboxypeptidase M (CPM) for LPs. **B)** DE (left) and LP (right) differentiation efficiencies quantified by the frequency of CXCR4+, FOXA2+, SOX17+ cells and Epcam+, CPM+, NKX2-1+ cells, respectively. Results are expressed as mean±SEM (n=2-13 independent differentiations, 8 iPSC lines). **C)** Representative images of iPSC-aLOs generated from different iPSC-lines. Scale bars: 200µm **D)** Real time quantitative PCR results showing lung markers expressed in iPSC-aLOs derived from different iPSC lines (n=2) across passages. Gene expression is normalized to earlier passage of line BU3NG (used as reference in this study). Results are expressed as mean ±SEM (n=2-9 replicates across passages). ***DE:*** *definitive endoderm,* ***AFE:*** *anterior-foregut endoderm,* ***LP:*** *lung progenitors.*

**
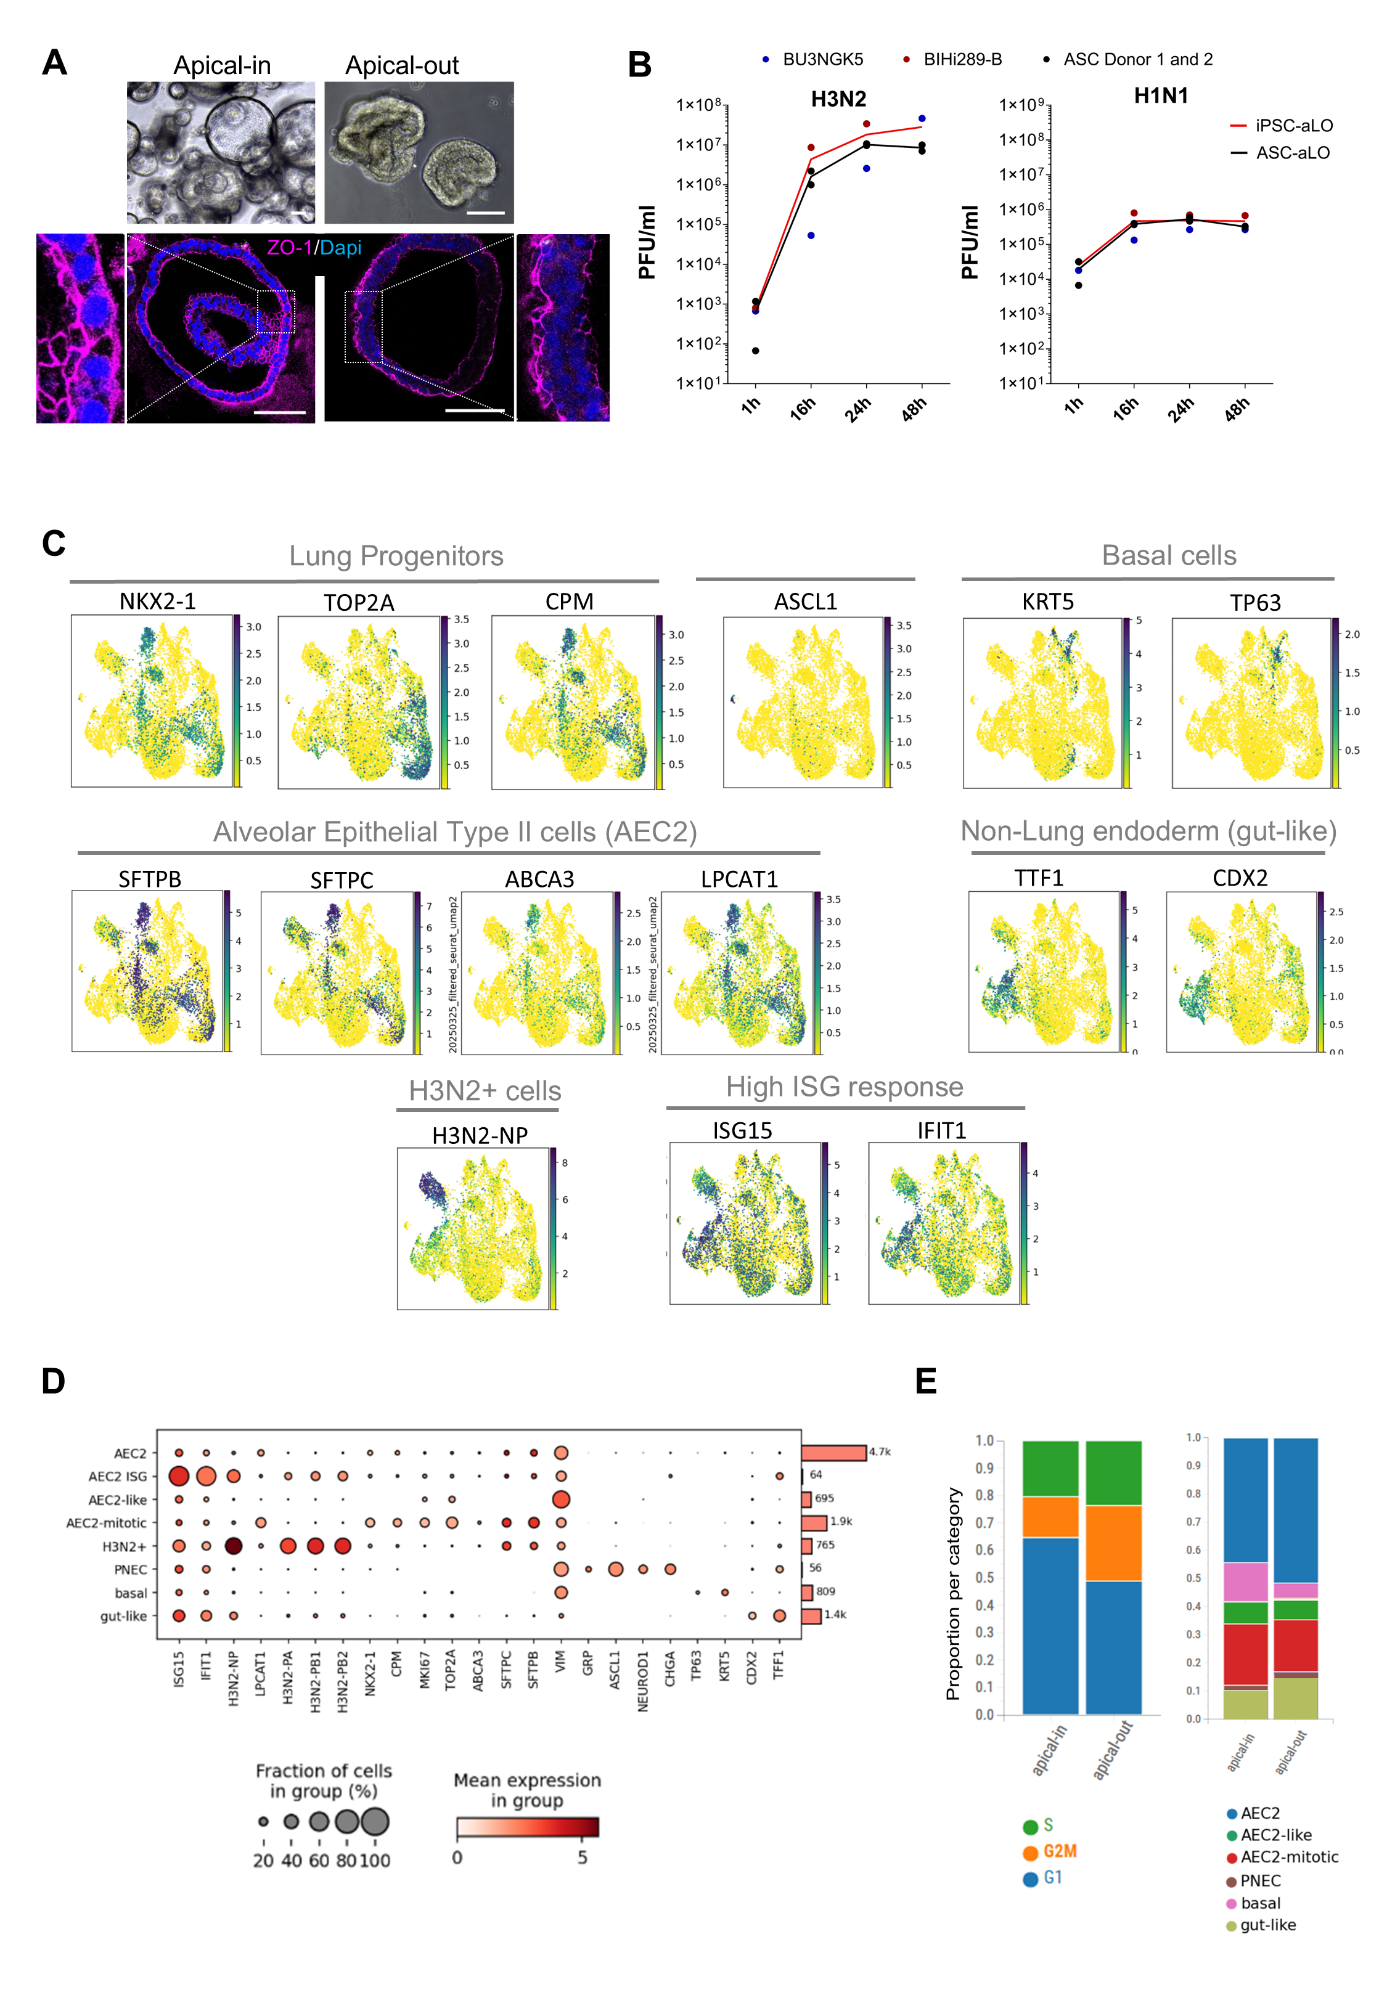
**

**Supplementary Figure 3. iPSC-aLOs phenotypic characteristics**. **A)** Representative bright field and immunofluorescence images of iPSC-aLOs in apical-out and apical-in conformation. Scale bars: 100µm. **B)** Quantification of plaque forming units (PFU), replication curves are shown for iPSC-aLOs (n=2 hiPSC lines) and ASC-aLOs (n=2 donors) upon H3N2 and H1N1 infection up to 48hpi. **C)** UMAPs showing cluster marker gene expression according to annotated populations. **D)** Dot plot showing marker genes expression per cluster of single-cell RNA sequencing of H3N2-infected and uninfected iPSC-aLOs at 24hpi (n=2, hiPSC lines as biological replicates). **E)** Cell cycle phase (left) and cell type cluster (right) distribution for apical-in and apical-out iPSC-aLOs conformation in control samples (uninfected). ***iPSC-aLOs:*** *hiPSC-derived alveolar-like lung organoids.*

**
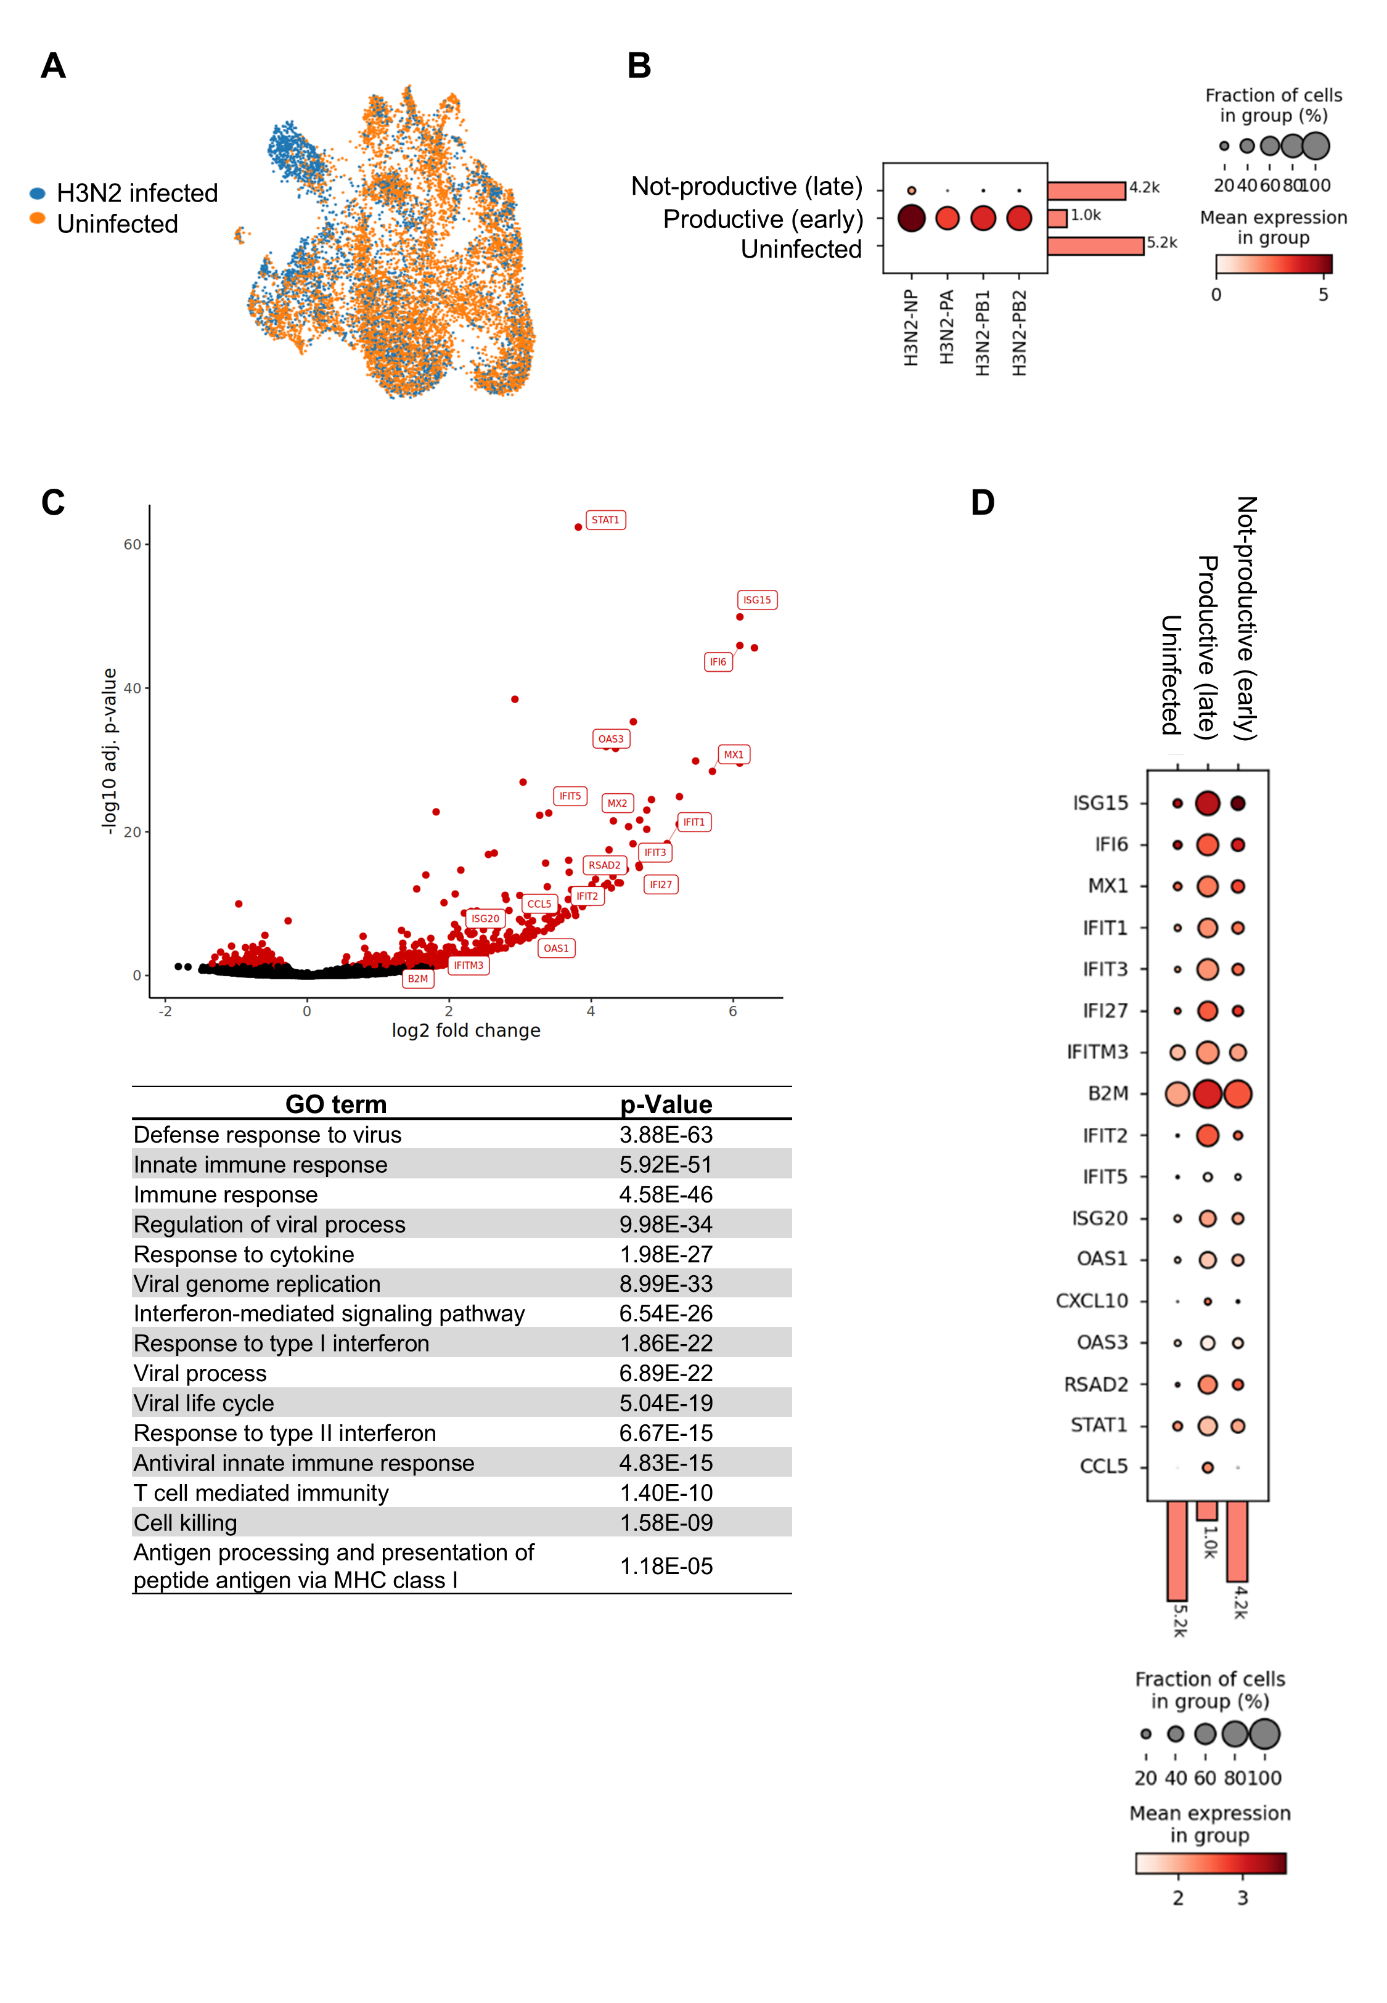
**

**Supplementary Figure 4. iPSC-aLOs show interferon stimulated gene response upon H3N2 infection.** **A)** UMAP showing distribution of infected and uninfected cells. **B)** Dot plot showing expression of viral genes and fraction of cells per group for infected, likely productive infected and uninfected cells by single-cell RNA sequencing (scRNA-seq). **C)** Vulcano plot showing differential gene expression of infected versus uninfected samples from scRNA-seq with interferon stimulated genes (ISGs) highlighted (upper panel). Gene ontology (GO) terms given for up-regulated genes (lower panel). **D)** Dot plot indicating expression levels of ISG among infected, likely productive and uninfected single cell clusters. ***iPSC-aLOs:*** *hiPSC-derived alveolar-like lung organoids;* ***ASC-aLOs:*** *adult stem cell-derived alveolar-like lung organoids.*

**
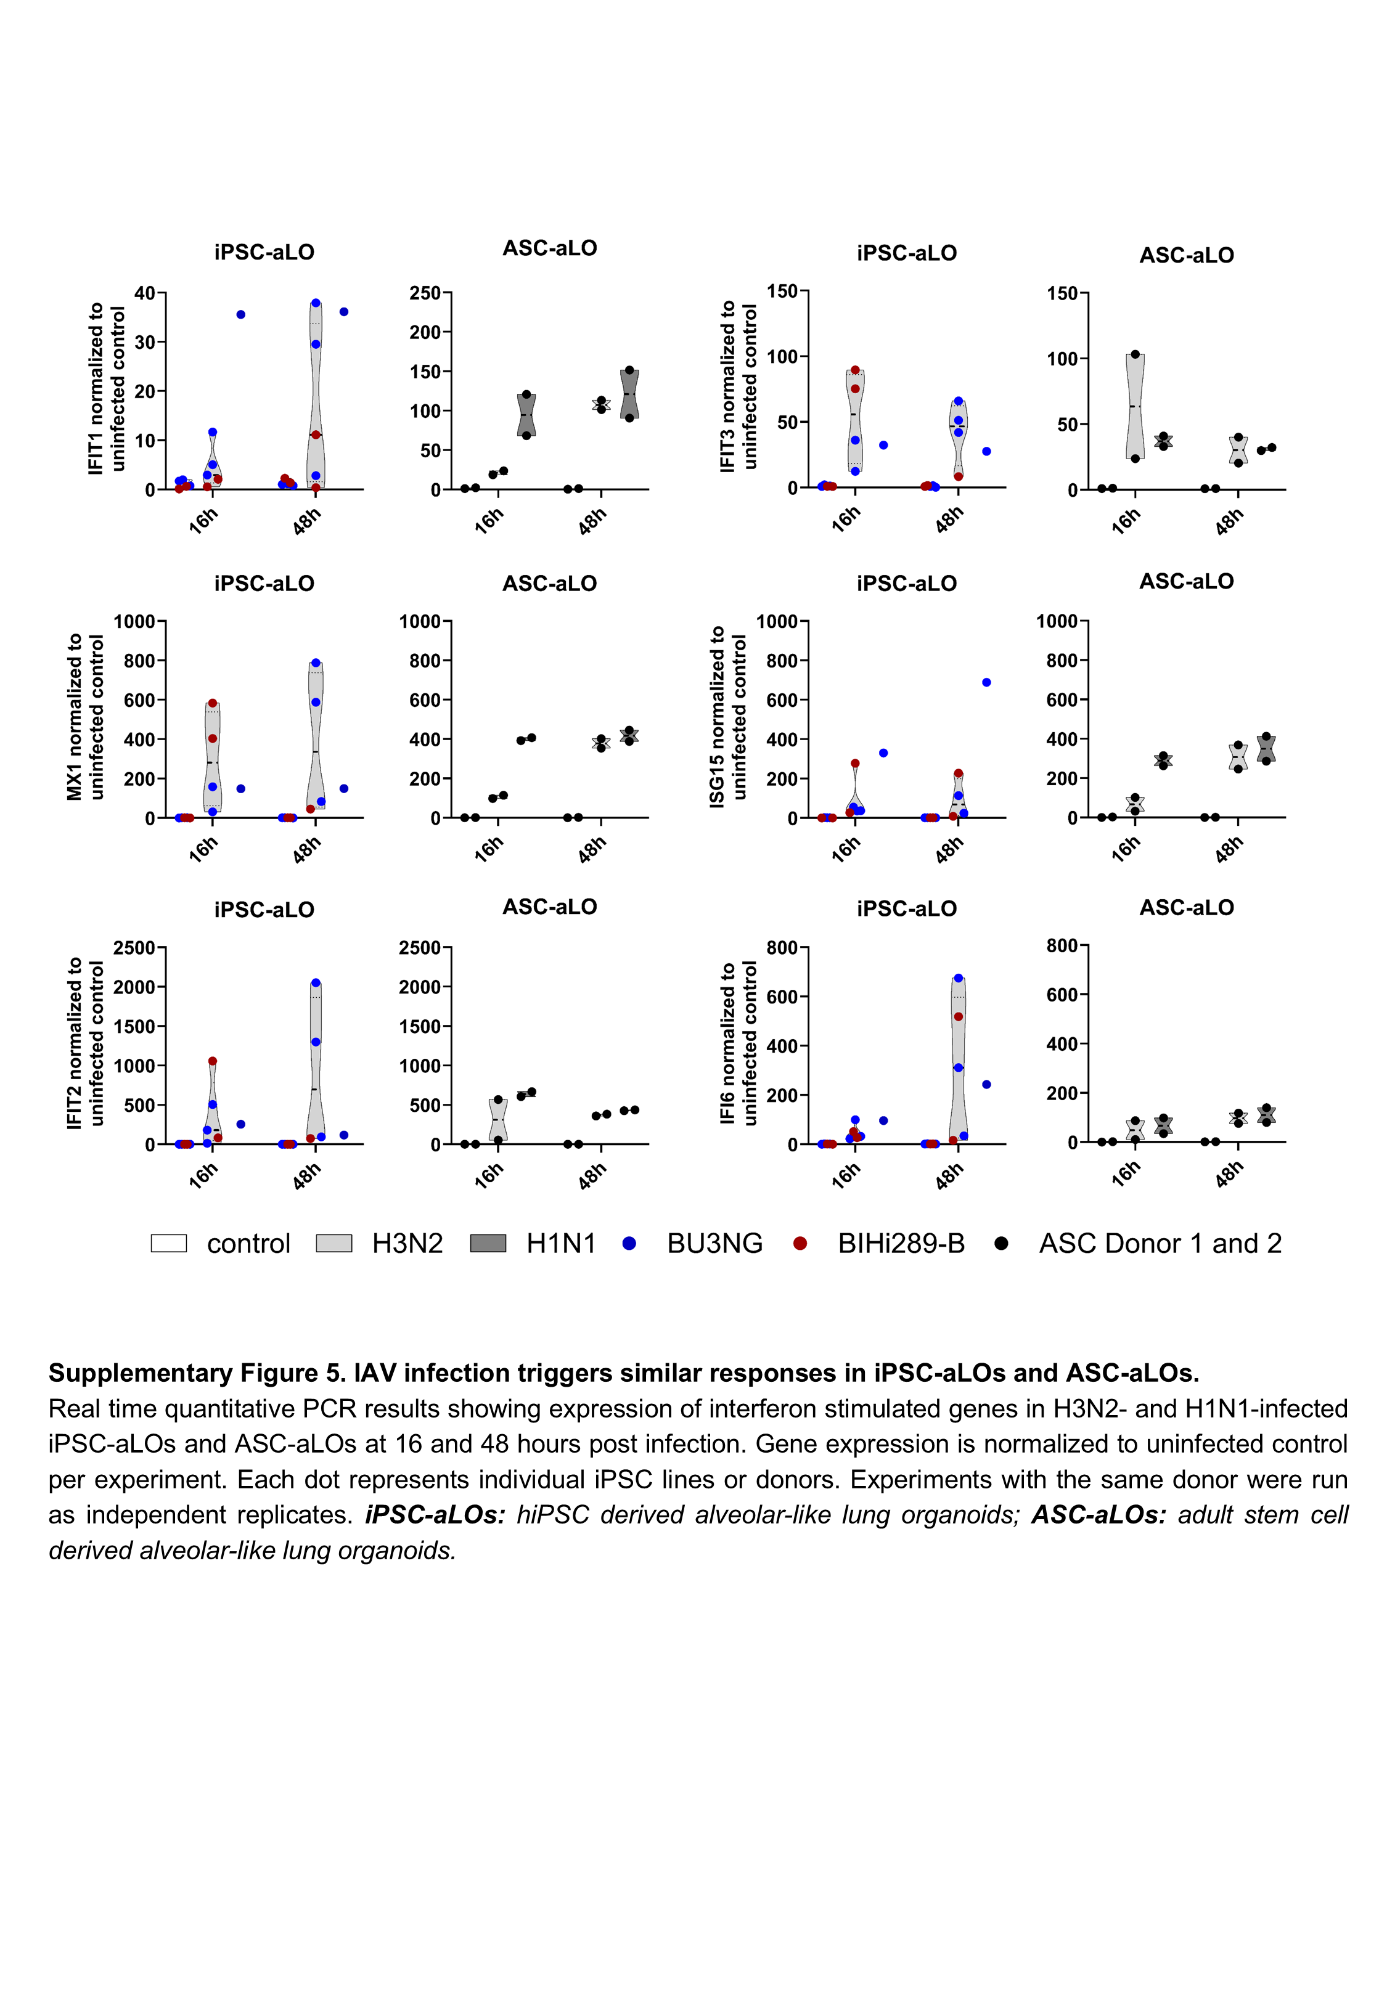
**

**Supplementary Figure 5. IAV infection triggers similar responses in iPSC-aLOs and ASC-aLOs.** Real time quantitative PCR results showing expression of interferon stimulated genes in H3N2- and H1N1-infected iPSC-aLOs and ASC-aLOs at 16 and 48 hours post infection. Gene expression is normalized to uninfected control per experiment. Each dot represents individual iPSC lines or donors. Experiments with the same donor were run as independent replicates. ***iPSC-aLOs:*** *hiPSC derived alveolar-like lung organoids;* ***ASC-aLOs:*** *adult stem cell derived alveolar-like lung organoids.*

**
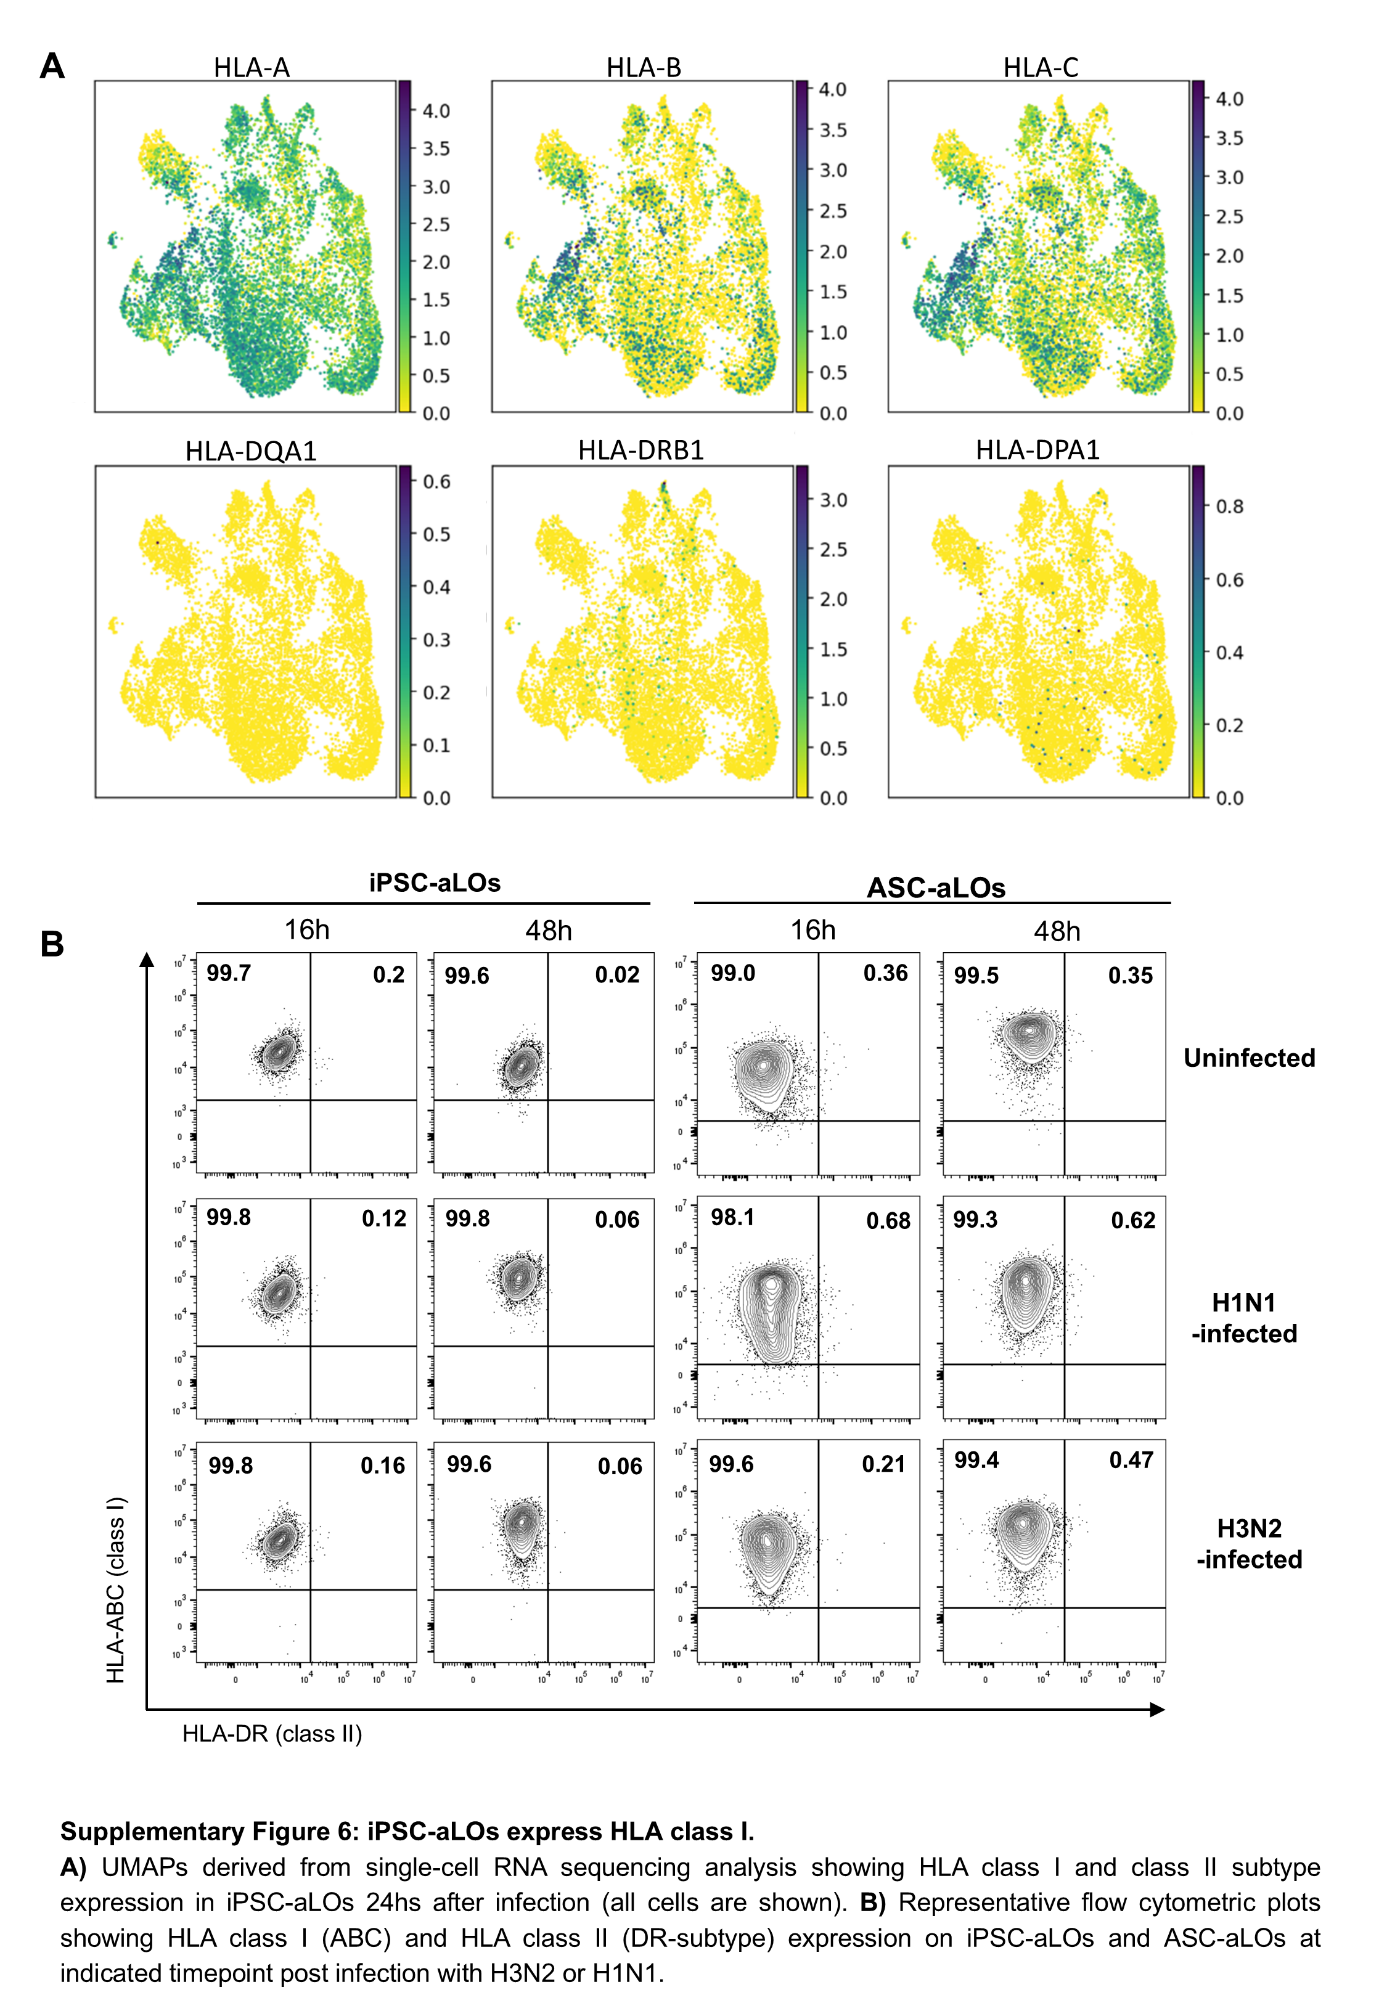
**

**Supplementary Figure 6: iPSC-aLOs express HLA class I. A)** UMAPs derived from single-cell RNA sequencing analysis showing HLA class I and class II subtype expression in iPSC-aLOs 24hs after infection (all cells are shown). **B)** Representative flow cytometric plots showing HLA class I (ABC) and HLA class II (DR-subtype) expression on iPSC-aLOs and ASC-aLOs at indicated timepoint post infection with H3N2 or H1N1.

**
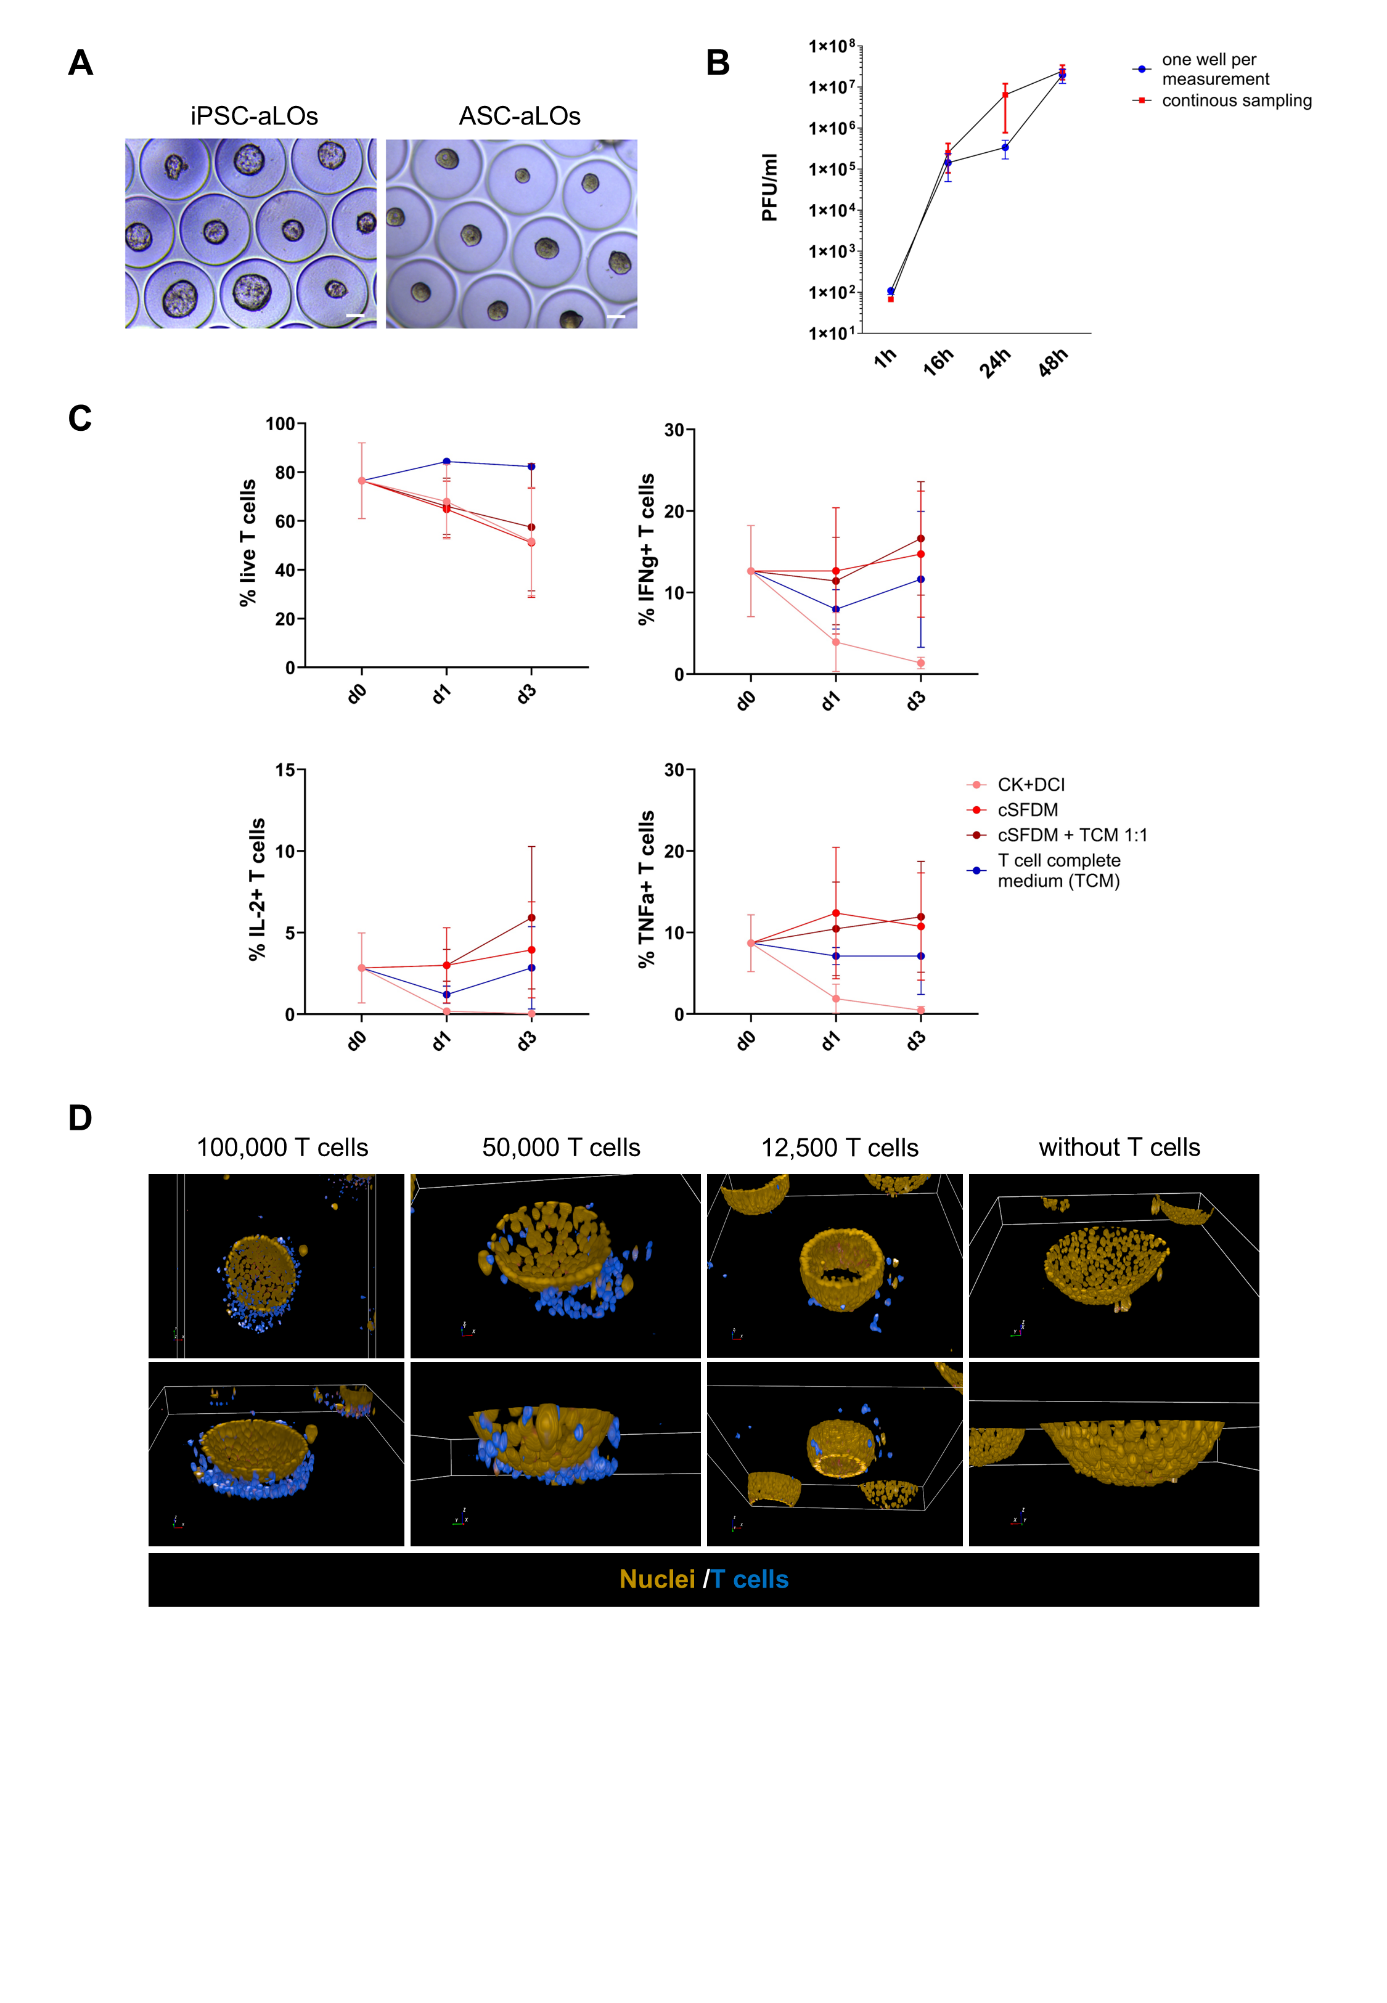
**

**Supplementary Figure 7. Lung organoids and T cells co-culture establishment. A)** Representative bright field images showing size of iPSC-aLOs and ASC-aLOs cultured in Gri3D prior infection. Scale bar: 100 µm. **B)** Virus particle quantification using plaque forming unit (PFU) assay of H3N2-infected ASC-aLOs in Gri3D. Results are shown as mean ±SEM (n=3). Sampling comparison: one well per timepoint versus continuous sampling from same well. **C)** Flow cytometric assessment showing T cell viability and frequency of effector cytokine production over time for different co-culture formulations: iPSC-aLOs complete medium (CK+DCI), iPSC-aLOs basal medium (cSFDM), cSFDM plus T cell complete medium (TCM) 1:1 and TCM alone. Results are shown as mean ±SEM (n=2). **D)** Representative 3D images showing titration of T cells added to iPSC-aLOs for subsequent segmentation. ***iPSC-aLOs:*** *hiPSC derived alveolar-like lung organoids;* ***ASC-aLOs:*** *adult stem cell derived alveolar-like lung organoids.*

**
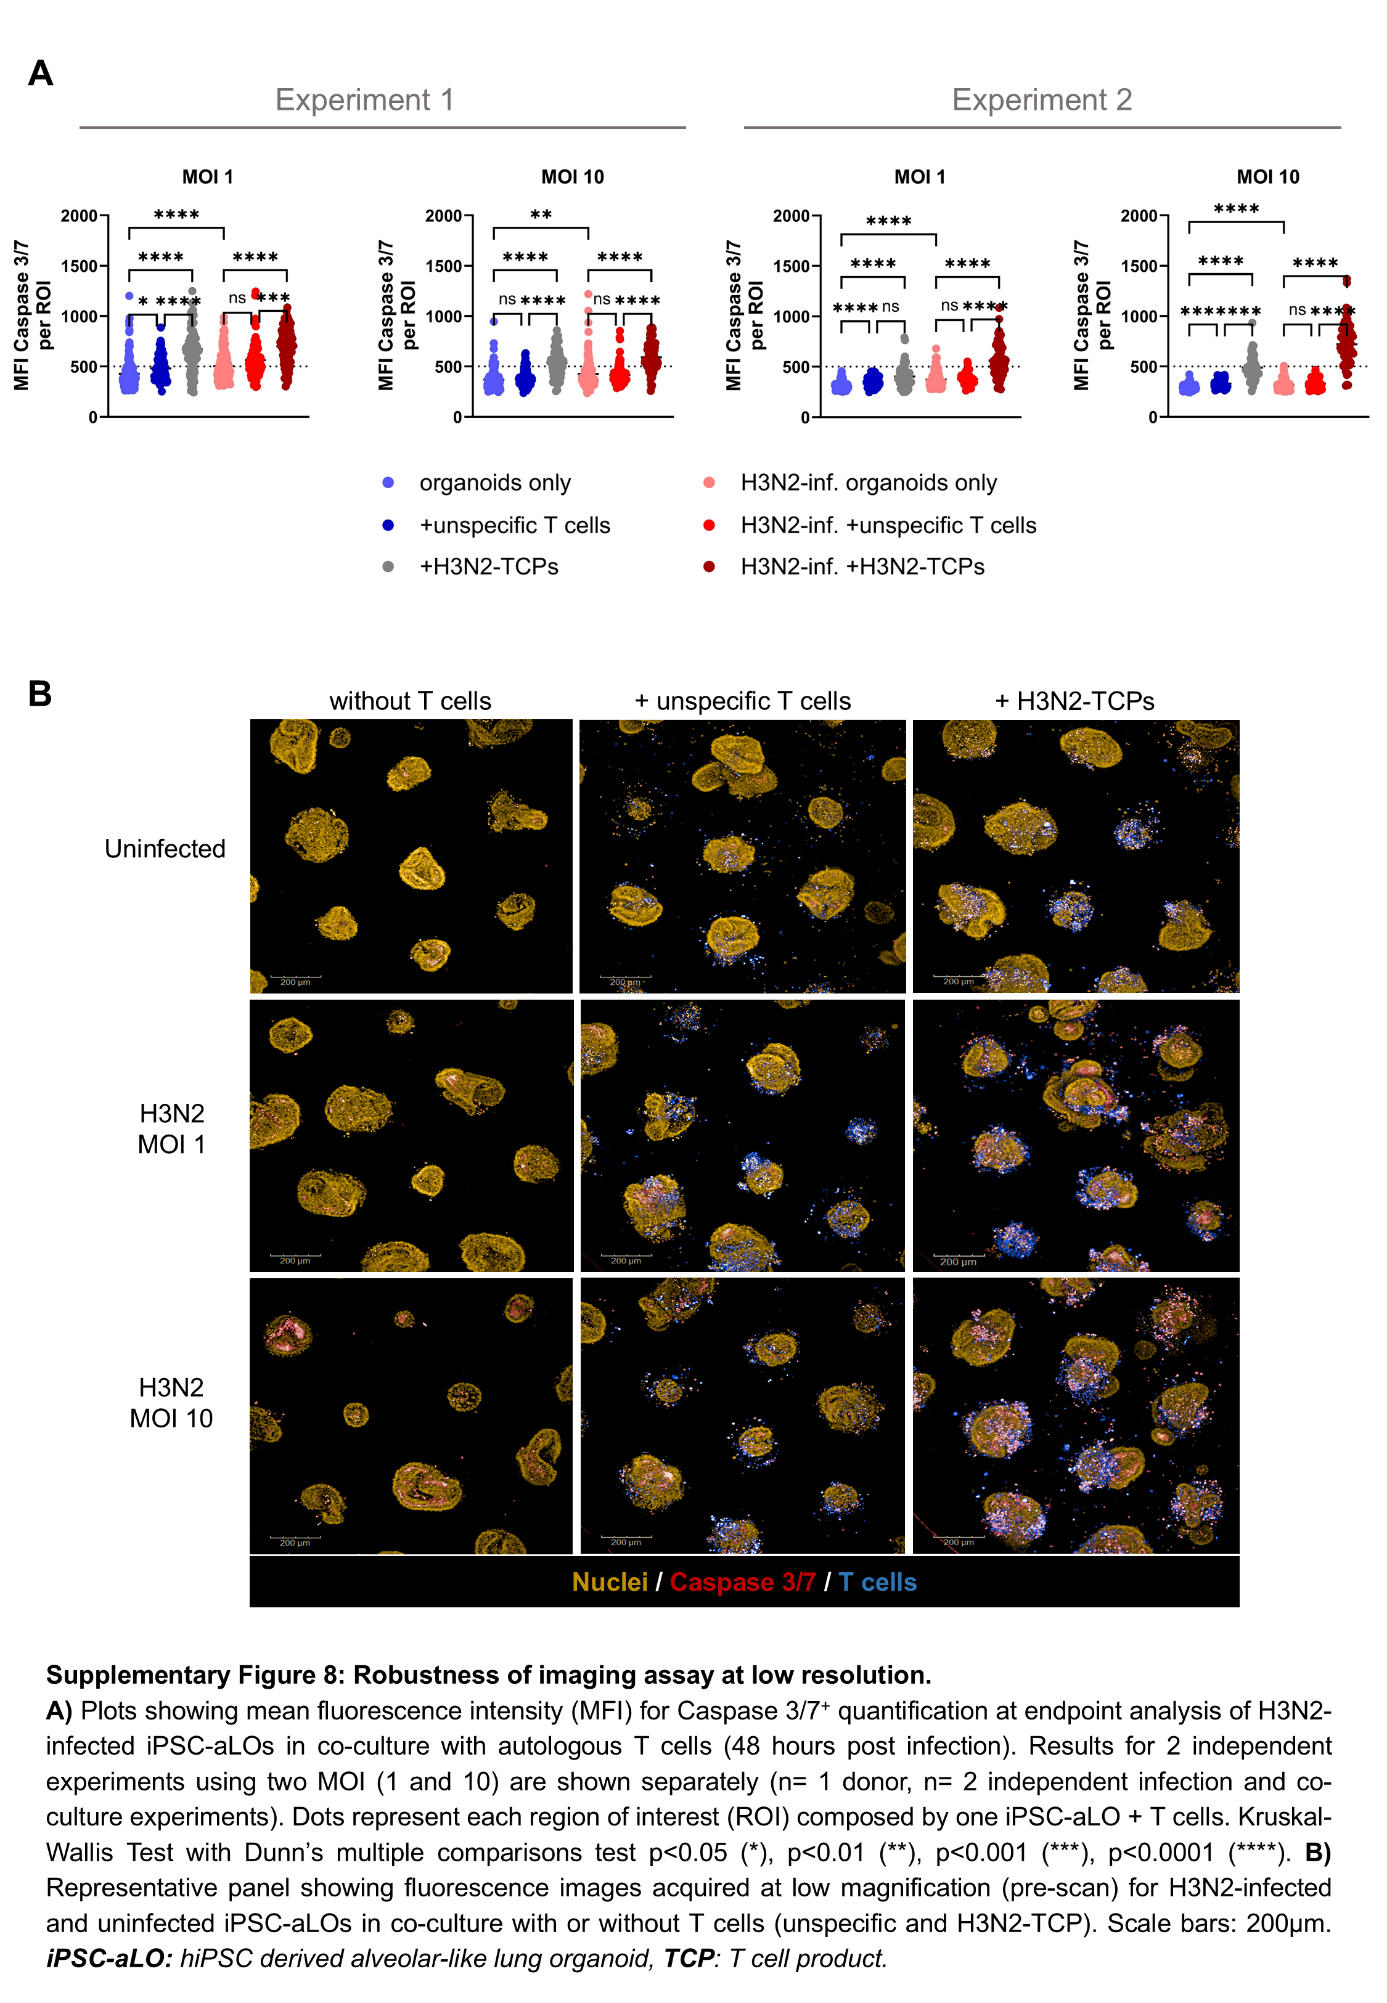
**

**Supplementary Figure 8: Robustness of imaging assay at low resolution. A)** Plots showing mean fluorescence intensity (MFI) for Caspase 3/7+ quantification at endpoint analysis of H3N2-infected iPSC-aLOs in co-culture with autologous T cells (48 hours post infection). Results for 2 independent experiments using two MOI (1 and 10) are shown separately (n= 1 donor, n= 2 independent infection and co-culture experiments). Dots represent each region of interest (ROI) composed by one iPSC-aLO + T cells. Kruskal-Wallis Test with Dunn’s multiple comparisons test p<0.05 (*), p<0.01 (**), p<0.001 (***), p<0.0001 (****). **B)** Representative panel showing fluorescence images acquired at low magnification (pre-scan) for H3N2-infected and uninfected iPSC-aLOs in co-culture with or without T cells (unspecific and H3N2-TCP). Scale bars: 200µm. ***iPSC-aLO:*** *hiPSC derived alveolar-like lung organoid,* ***TCP****: T cell product.*

**
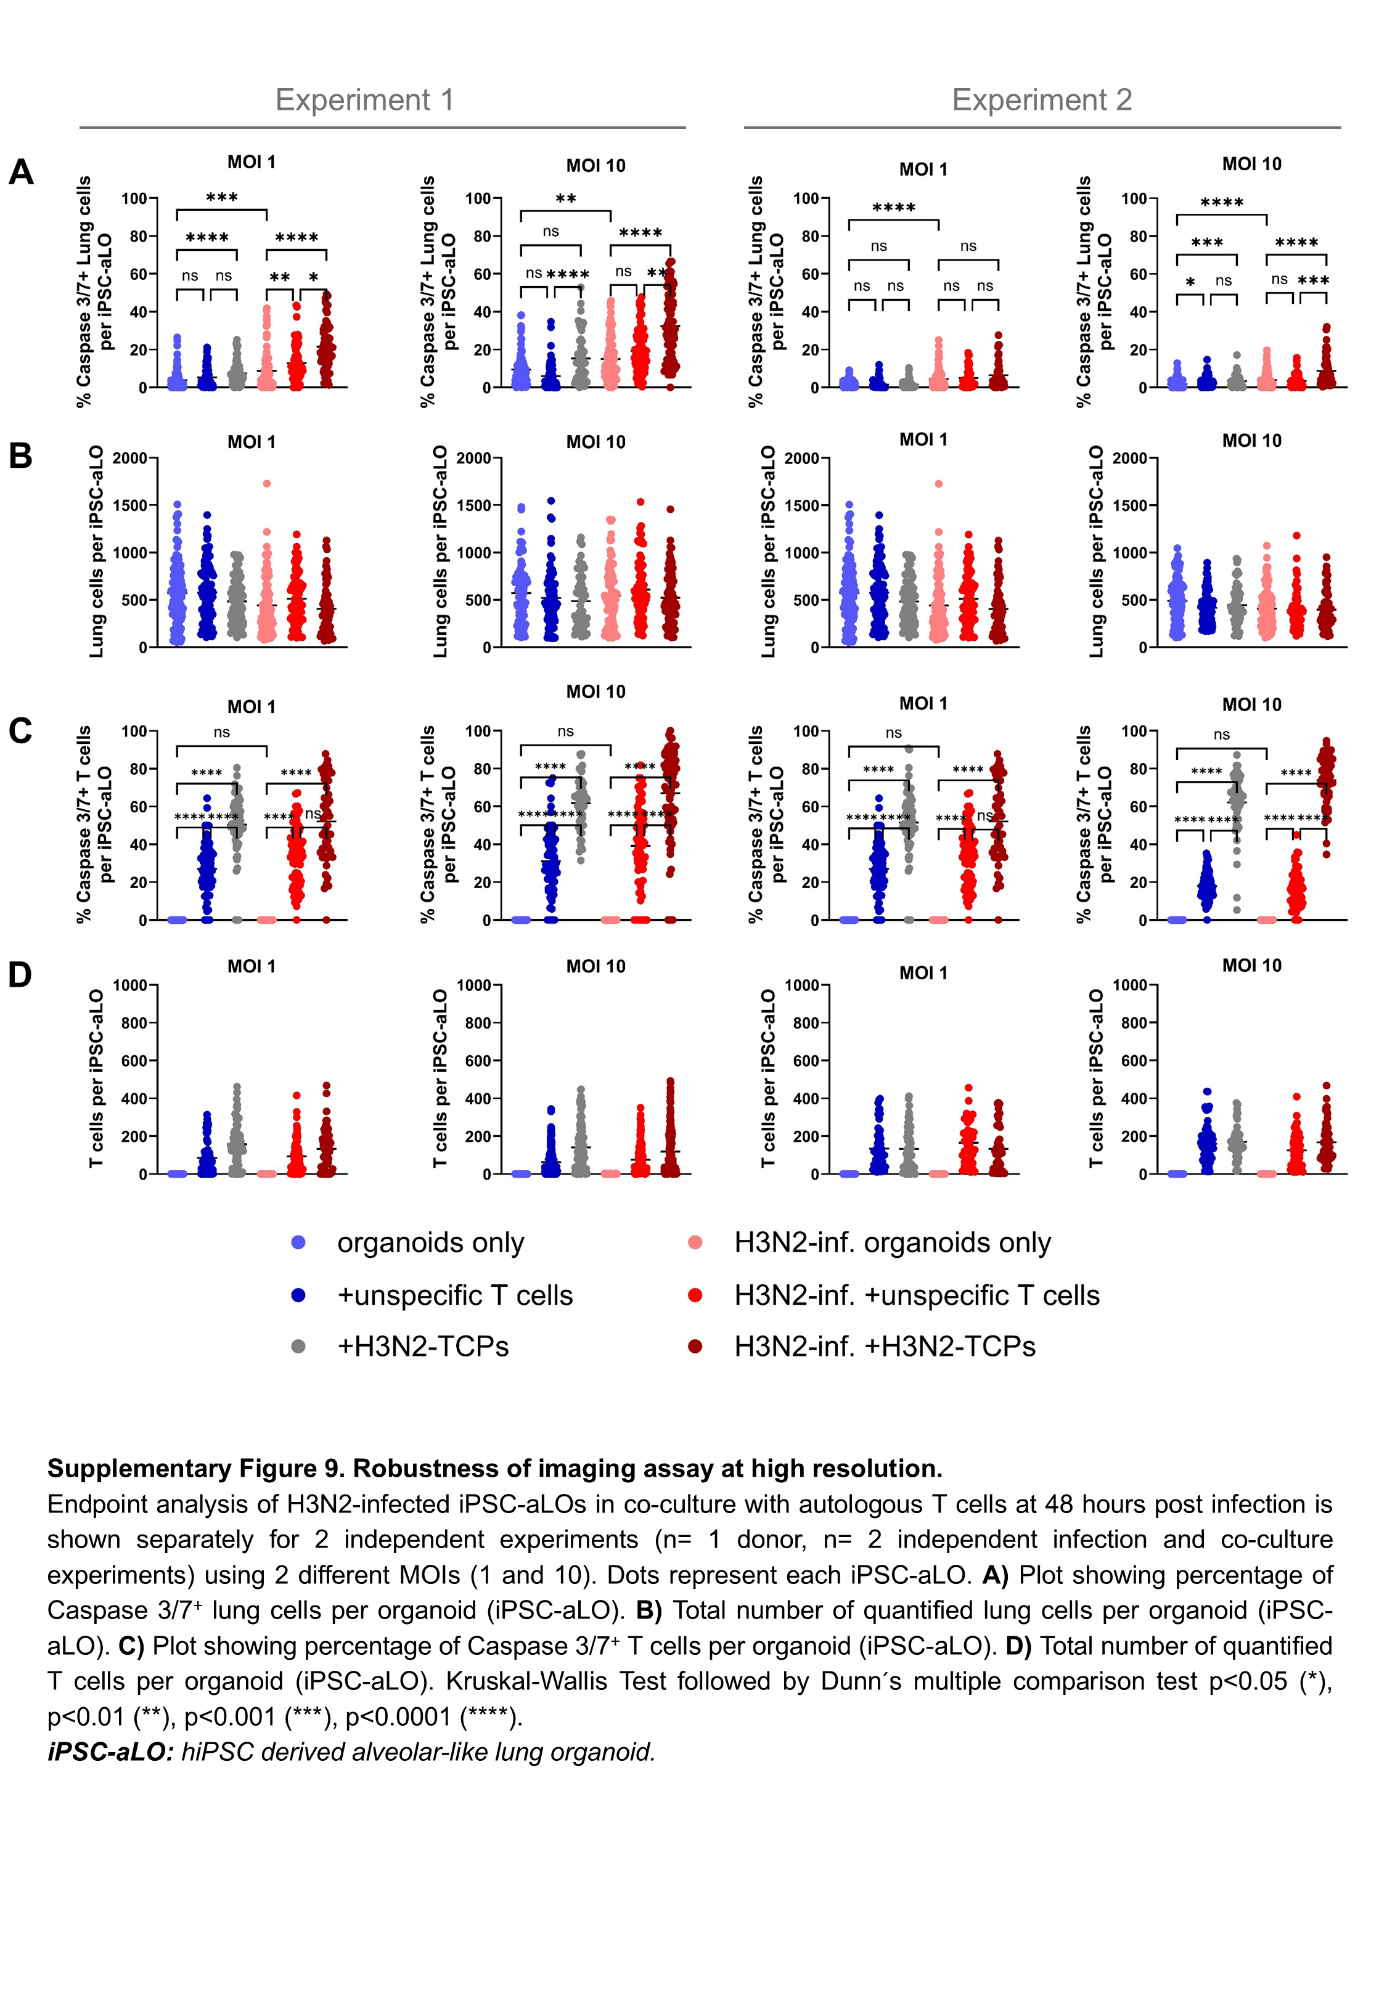
**

**Supplementary Figure 9. Robustness of imaging assay at high resolution.** Endpoint analysis of H3N2-infected iPSC-aLOs in co-culture with autologous T cells at 48 hours post infection is shown separately for 2 independent experiments (n= 1 donor, n= 2 independent infection and co-culture experiments) using 2 different MOIs (1 and 10). Dots represent each iPSC-aLO. **A)** Plot showing percentage of Caspase 3/7+ lung cells per organoid (iPSC-aLO). **B)** Total number of quantified lung cells per organoid (iPSC-aLO). **C)** Plot showing percentage of Caspase 3/7+ T cells per organoid (iPSC-aLO). **D)** Total number of quantified T cells per organoid (iPSC-aLO). Kruskal-Wallis Test followed by Dunn´s multiple comparison test p<0.05 (*), p<0.01 (**), p<0.001 (***), p<0.0001 (****).

***iPSC-aLO:*** *hiPSC derived alveolar-like lung organoid.*
